# Supplementary material for: Distinct effects of short-term reconstructed topsoil on soya bean and corn rhizosphere bacterial abundance and communities in Chinese Mollisol
Source: R Soc Open Sci. 2019 Jan 30;6(1):181054. doi: 10.1098/rsos.181054 (PMC6366214; doi:10.1098/rsos.181054)
Supplement: Table S1: [file rsos181054supp1.xls]

## Sheet: Sheet1
	Table S1 The correlations between soil biogeochemical characteristics and significantly affected genus by topsoil depths
soybean			MBC	MBN	TP	TK	AP	AK	DOC	DON	pH	NH4+−N	NO3--N	TN	TC
	g__Rhodanobacter	Pearson Correlation	-0.248	-0.306	-0.109	-0.345	0.128	0.049	-0.079	-0.506	-0.108	0.284	0.211	0.615	-0.44
		Sig. (2-tailed)	0.52	0.423	0.78	0.363	0.743	0.9	0.839	0.164	0.782	0.459	0.586	0.078	0.236
	g__Bradyrhizobium	Pearson Correlation	0.252	.691*	-0.3	0.11	-.746*	-0.395	-0.078	.712*	0.178	0.354	-0.418	-0.476	0.558
		Sig. (2-tailed)	0.514	0.039	0.433	0.777	0.021	0.293	0.841	0.031	0.647	0.35	0.262	0.195	0.118
	g__Haliangium	Pearson Correlation	-0.074	-.836**	-0.096	-0.132	0.466	0.638	-0.237	-0.52	0.04	0.034	0.64	0.502	-0.623
		Sig. (2-tailed)	0.851	0.005	0.805	0.736	0.206	0.064	0.539	0.151	0.92	0.931	0.064	0.168	0.073
	g__norank_f__Xanthobacteraceae	Pearson Correlation	0.182	0.666	-0.311	-0.03	-0.405	-0.6	0.35	0.574	0.223	0.307	-0.507	0.077	.697*
		Sig. (2-tailed)	0.639	0.05	0.415	0.939	0.279	0.088	0.356	0.106	0.564	0.422	0.163	0.844	0.037
	g__unclassified_f__Xanthomonadaceae	Pearson Correlation	-0.31	-.733*	-0.25	-0.5	0.362	0.307	-0.302	-.687*	0.276	0.138	0.211	0.431	-0.545
		Sig. (2-tailed)	0.416	0.025	0.516	0.17	0.338	0.422	0.429	0.041	0.472	0.724	0.585	0.246	0.129
	g__norank_f__DA111	Pearson Correlation	-0.146	-0.269	0.075	0.046	0.421	0.373	-0.125	-0.471	-0.393	-0.583	0.284	-0.444	-0.506
		Sig. (2-tailed)	0.707	0.484	0.848	0.906	0.259	0.323	0.749	0.201	0.296	0.1	0.459	0.231	0.165
	g__Mesorhizobium	Pearson Correlation	-0.101	-0.335	-0.468	-0.03	-0.062	0.259	0.031	0.016	0.404	0.326	0.249	0.469	-0.176
		Sig. (2-tailed)	0.795	0.377	0.203	0.94	0.875	0.502	0.938	0.967	0.28	0.392	0.518	0.202	0.65
	g__unclassified_f__Gemmatimonadaceae	Pearson Correlation	-0.495	-0.234	0.255	0.012	0.205	0.111	-0.045	-0.437	0.22	-0.573	-0.051	-0.242	-0.268
		Sig. (2-tailed)	0.176	0.545	0.508	0.975	0.596	0.775	0.909	0.239	0.569	0.107	0.896	0.53	0.486
	g__Gemmatimonas	Pearson Correlation	-0.065	-0.229	0.182	0.253	0.347	0.202	0.211	0.051	0.316	-0.524	-0.028	-0.223	0.118
		Sig. (2-tailed)	0.867	0.553	0.639	0.511	0.36	0.602	0.586	0.897	0.407	0.148	0.943	0.563	0.761
corn	g__Marmoricola	Pearson Correlation	0.007	-0.337	-0.238	-0.138	0.66	0.393	0.664	0.148	0.239	0.169	0.359	0.043	-0.241
		Sig. (2-tailed)	0.986	0.376	0.537	0.724	0.053	0.295	0.051	0.705	0.536	0.663	0.343	0.913	0.532
	g__Pseudonocardia	Pearson Correlation	0.082	-0.317	-0.466	-0.496	0.311	0.393	0.556	-0.278	0.467	-0.266	-0.077	0.047	-0.34
		Sig. (2-tailed)	0.833	0.407	0.206	0.175	0.415	0.295	0.12	0.469	0.205	0.49	0.844	0.905	0.371
	g__norank_o__Gaiellales	Pearson Correlation	0.222	0.125	0.087	0.627	-0.047	-0.491	-0.051	-0.41	-.751*	-0.296	-0.351	0.448	0.66
		Sig. (2-tailed)	0.566	0.749	0.823	0.071	0.904	0.179	0.896	0.273	0.02	0.439	0.354	0.226	0.053
